# Supplementary material for: Vaccinia Virus in Blood Samples of Humans, Domestic and Wild Mammals in Brazil
Source: Viruses. 2018 Jan 18;10(1):42. doi: 10.3390/v10010042 (PMC5795455; doi:10.3390/v10010042)
Supplement: Supplementary file 1 [file viruses-10-00042-s001.pdf]

**Table S1.** Percentage of identity between the Vaccinia virus (VACV) DNA positive samples from different milking farms

|     | 225 | 270 | 263 | 693 | 706 | 211 |
|-----|-----|-----|-----|-----|-----|-----|
| 270 | 97% |     |     |     |     |     |
| 263 | 96% | 96% |     |     |     |     |
| 693 | 96% | 97% | 96% |     |     |     |
| 706 | 96% | 97% | 96% | 97% |     |     |
| 211 | 96% | 96% | 95% | 96% | 96% |     |
| 694 | 96% | 97% | 97% | 96% | 97% | 96% |
